# Supplementary material for: Real-World Data on Antibiotic Group Treatment in European Livestock: Drivers, Conditions, and Alternatives
Source: MDPI journal article supplement (doi:10.3390/antibiotics11081046), 2022-08-03
Supplement: s1 [file s1]

Table S1. Demographic features of responding veterinarians

| Countries, practice type and size                          | Experience | <5 years | > 25 years | 16-25 years | 6-15 years | Total |
|------------------------------------------------------------|------------|----------|------------|-------------|------------|-------|
| <b>Armenia</b>                                             |            |          |            | 1           |            | 1     |
| Practice specialised in cattle                             |            |          |            | 1           |            | 1     |
| Large practice                                             |            |          |            | 1           |            | 1     |
| <b>Austria</b>                                             |            |          |            | 1           |            | 1     |
| Practice specialised in poultry, incl. chicken and turkeys |            |          |            | 1           |            | 1     |
| Medium practice                                            |            |          |            | 1           |            | 1     |
| <b>Belgium</b>                                             |            |          | 2          |             |            | 2     |
| Mixed practice                                             |            |          | 1          |             |            | 1     |
| Medium practice                                            |            |          | 1          |             |            | 1     |
| Practice specialised in poultry, incl. chicken and turkeys |            |          | 1          |             |            | 1     |
| Large practice                                             |            |          | 1          |             |            | 1     |
| <b>Bulgaria</b>                                            |            | 1        | 2          | 1           | 2          | 6     |
| Mixed practice                                             |            | 1        | 1          |             | 1          | 3     |
| Large practice                                             |            | 1        |            |             |            | 1     |
| Very small practice                                        |            |          | 1          |             | 1          | 2     |
| Practice specialised in cattle                             |            |          | 1          |             | 1          | 2     |
| Very small practice                                        |            |          |            |             | 1          | 1     |
| (blank)                                                    |            |          | 1          |             |            | 1     |
| Practice specialised in poultry, incl. chicken and turkeys |            |          |            | 1           |            | 1     |
| Large practice                                             |            |          |            | 1           |            | 1     |
| <b>Croatia</b>                                             |            |          |            | 1           |            | 1     |
| Mixed practice                                             |            |          |            | 1           |            | 1     |
| Large practice                                             |            |          |            | 1           |            | 1     |
| <b>Czech Republic</b>                                      |            |          | 3          |             |            | 3     |
| Mixed practice                                             |            |          | 1          |             |            | 1     |
| Very small practice                                        |            |          | 1          |             |            | 1     |
| Practice specialised in pigs                               |            |          | 2          |             |            | 2     |
| Very small practice                                        |            |          | 2          |             |            | 2     |
| <b>Denmark</b>                                             |            | 1        | 5          |             |            | 6     |

|                                                                   |          |           |           |           |            |
|-------------------------------------------------------------------|----------|-----------|-----------|-----------|------------|
| <b>Mixed practice</b>                                             |          | <b>1</b>  |           |           | <b>1</b>   |
| Small practice                                                    |          | 1         |           |           | 1          |
| <b>Practice specialised in pigs</b>                               | <b>1</b> | <b>4</b>  |           |           | <b>5</b>   |
| Large practice                                                    |          | 2         |           |           | 2          |
| Small practice                                                    | 1        | 1         |           |           | 2          |
| Very small practice                                               |          | 1         |           |           | 1          |
| <b>Finland</b>                                                    |          | <b>1</b>  | <b>1</b>  | <b>3</b>  | <b>5</b>   |
| <b>Mixed practice</b>                                             |          |           | <b>1</b>  | <b>3</b>  | <b>4</b>   |
| Very small practice                                               |          |           | 1         | 3         | 4          |
| <b>Practice specialised in poultry, incl. chicken and turkeys</b> |          | <b>1</b>  |           |           | <b>1</b>   |
| Medium practice                                                   |          | 1         |           |           | 1          |
| <b>France</b>                                                     | <b>6</b> | <b>42</b> | <b>28</b> | <b>32</b> | <b>108</b> |
| <b>Cuniculture</b>                                                |          | <b>1</b>  |           |           | <b>1</b>   |
| Large practice                                                    |          | 1         |           |           | 1          |
| <b>Mixed practice</b>                                             | <b>5</b> | <b>13</b> | <b>12</b> | <b>14</b> | <b>44</b>  |
| Large practice                                                    | 4        | 4         | 6         | 1         | 15         |
| Medium practice                                                   |          | 3         | 5         | 6         | 14         |
| Small practice                                                    | 1        | 3         |           | 5         | 9          |
| Very small practice                                               |          | 3         | 1         | 2         | 6          |
| <b>Practice specialised in cattle</b>                             |          | <b>8</b>  | <b>4</b>  | <b>6</b>  | <b>18</b>  |
| Large practice                                                    |          |           | 2         | 3         | 5          |
| Medium practice                                                   |          | 4         | 1         | 1         | 6          |
| Small practice                                                    |          | 3         | 1         | 2         | 6          |
| Very small practice                                               |          | 1         |           |           | 1          |
| <b>Practice specialised in pigs</b>                               | <b>1</b> | <b>15</b> | <b>4</b>  | <b>4</b>  | <b>24</b>  |
| Large practice                                                    | 1        | 8         | 2         | 2         | 13         |
| Medium practice                                                   |          | 6         | 1         | 1         | 8          |
| Small practice                                                    |          |           | 1         |           | 1          |
| Very small practice                                               |          | 1         |           | 1         | 2          |
| <b>Practice specialised in poultry, incl. chicken and turkeys</b> |          | <b>5</b>  | <b>7</b>  | <b>7</b>  | <b>19</b>  |
| Large practice                                                    |          | 1         | 4         | 4         | 9          |
| Medium practice                                                   |          | 2         | 1         | 2         | 5          |
| Small practice                                                    |          | 1         | 1         | 1         | 3          |
| Very small practice                                               |          | 1         | 1         |           | 2          |

|                                                                   |          |           |           |           |           |
|-------------------------------------------------------------------|----------|-----------|-----------|-----------|-----------|
| <b>Practice specialised in sheep and goats</b>                    |          |           | <b>1</b>  | <b>1</b>  | <b>2</b>  |
| Very small practice                                               |          |           | 1         | 1         | 2         |
| <b>Germany</b>                                                    | <b>5</b> | <b>26</b> | <b>13</b> | <b>17</b> | <b>61</b> |
| <b>Mixed practice</b>                                             | <b>2</b> | <b>15</b> | <b>8</b>  | <b>4</b>  | <b>29</b> |
| Large practice                                                    | 1        | 1         |           |           | 2         |
| Medium practice                                                   |          | 1         | 2         |           | 3         |
| Small practice                                                    | 1        | 7         | 1         |           | 9         |
| Very small practice                                               |          | 6         | 5         | 4         | 15        |
| <b>Practice specialised in cattle</b>                             | <b>1</b> | <b>3</b>  |           | <b>1</b>  | <b>5</b>  |
| Small practice                                                    | 1        |           |           |           | 1         |
| Very small practice                                               |          | 3         |           | 1         | 4         |
| <b>Practice specialised in pigs</b>                               | <b>1</b> | <b>4</b>  |           | <b>4</b>  | <b>9</b>  |
| Large practice                                                    | 1        | 1         |           | 1         | 3         |
| Medium practice                                                   |          | 1         |           | 1         | 2         |
| Small practice                                                    |          | 1         |           |           | 1         |
| Very small practice                                               |          | 1         |           | 2         | 3         |
| <b>Practice specialised in poultry, incl. chicken and turkeys</b> | <b>1</b> | <b>4</b>  | <b>5</b>  | <b>8</b>  | <b>18</b> |
| Large practice                                                    |          |           | 1         | 6         | 7         |
| Medium practice                                                   | 1        | 1         | 2         | 1         | 5         |
| Small practice                                                    |          | 2         | 1         |           | 3         |
| Very small practice                                               |          | 1         | 1         | 1         | 3         |
| <b>Greece</b>                                                     | <b>2</b> | <b>11</b> | <b>6</b>  | <b>7</b>  | <b>26</b> |
| <b>Mixed practice</b>                                             | <b>2</b> | <b>8</b>  | <b>3</b>  | <b>4</b>  | <b>17</b> |
| Very small practice                                               | 2        | 8         | 3         | 4         | 17        |
| <b>Practice specialised in cattle</b>                             |          |           | <b>2</b>  | <b>1</b>  | <b>3</b>  |
| Large practice                                                    |          |           | 1         |           | 1         |
| Very small practice                                               |          |           | 1         | 1         | 2         |
| <b>Practice specialised in pigs</b>                               |          |           |           | <b>1</b>  | <b>1</b>  |
| Very small practice                                               |          |           |           | 1         | 1         |
| <b>Practice specialised in poultry, incl. chicken and turkeys</b> |          | <b>3</b>  |           |           | <b>3</b>  |
| Small practice                                                    |          | 1         |           |           | 1         |
| Very small practice                                               |          | 2         |           |           | 2         |
| <b>Practice specialised in sheep and goats</b>                    |          |           | <b>1</b>  | <b>1</b>  | <b>2</b>  |
| Small practice                                                    |          |           | 1         |           | 1         |

|                                                                   |          |           |          |          |           |
|-------------------------------------------------------------------|----------|-----------|----------|----------|-----------|
| Very small practice                                               |          |           |          | 1        | 1         |
| <b>Hungary</b>                                                    | <b>1</b> | <b>28</b> | <b>9</b> | <b>8</b> | <b>46</b> |
| <b>Mixed practice</b>                                             | <b>1</b> | <b>21</b> | <b>8</b> | <b>5</b> | <b>35</b> |
| Very small practice                                               | 1        | 20        | 8        | 5        | 34        |
| (blank)                                                           |          | 1         |          |          | 1         |
| <b>Practice specialised in cattle</b>                             |          | <b>1</b>  |          |          | <b>1</b>  |
| Very small practice                                               |          | 1         |          |          | 1         |
| <b>Practice specialised in pigs</b>                               |          | <b>3</b>  | <b>1</b> | <b>2</b> | <b>6</b>  |
| Small practice                                                    |          | 1         |          |          | 1         |
| Very small practice                                               |          | 2         | 1        | 2        | 5         |
| <b>Practice specialised in poultry, incl. chicken and turkeys</b> |          | <b>3</b>  |          | <b>1</b> | <b>4</b>  |
| Very small practice                                               |          | 3         |          | 1        | 4         |
| <b>Ireland</b>                                                    |          |           |          | <b>2</b> | <b>2</b>  |
| <b>Mixed practice</b>                                             |          |           |          | <b>2</b> | <b>2</b>  |
| Very small practice                                               |          |           |          | 2        | 2         |
| <b>Italy</b>                                                      | <b>2</b> | <b>13</b> | <b>7</b> | <b>2</b> | <b>24</b> |
| <b>Mixed practice</b>                                             |          | <b>3</b>  |          |          | <b>3</b>  |
| Large practice                                                    |          | 2         |          |          | 2         |
| Very small practice                                               |          | 1         |          |          | 1         |
| <b>Practice specialised in cattle</b>                             | <b>1</b> | <b>5</b>  | <b>2</b> | <b>2</b> | <b>10</b> |
| Small practice                                                    |          |           |          | 1        | 1         |
| Very small practice                                               | 1        | 4         | 2        | 1        | 8         |
| (blank)                                                           |          | 1         |          |          | 1         |
| <b>Practice specialised in pigs</b>                               | <b>1</b> | <b>3</b>  | <b>3</b> |          | <b>7</b>  |
| Large practice                                                    |          |           | 1        |          | 1         |
| Small practice                                                    | 1        |           |          |          | 1         |
| Very small practice                                               |          | 3         | 2        |          | 5         |
| <b>Practice specialised in poultry, incl. chicken and turkeys</b> |          | <b>2</b>  | <b>1</b> |          | <b>3</b>  |
| Medium practice                                                   |          | 1         |          |          | 1         |
| Very small practice                                               |          | 1         | 1        |          | 2         |
| <b>Practice specialised in sheep and goats</b>                    |          |           | <b>1</b> |          | <b>1</b>  |
| (blank)                                                           |          |           | 1        |          | 1         |
| <b>Latvia</b>                                                     |          | <b>1</b>  |          |          | <b>1</b>  |
| <b>Mixed practice</b>                                             |          | <b>1</b>  |          |          | <b>1</b>  |

|                                                                   |          |           |           |           |           |
|-------------------------------------------------------------------|----------|-----------|-----------|-----------|-----------|
| Very small practice                                               |          | 1         |           |           | 1         |
| <b>Luxembourg</b>                                                 |          | <b>1</b>  |           | <b>2</b>  | <b>3</b>  |
| <b>Mixed practice</b>                                             |          | <b>1</b>  |           | <b>2</b>  | <b>3</b>  |
| Small practice                                                    |          |           |           | 2         | 2         |
| Very small practice                                               |          | 1         |           |           | 1         |
| <b>Malta</b>                                                      |          |           |           | <b>1</b>  | <b>1</b>  |
| <b>Mixed practice</b>                                             |          |           |           | <b>1</b>  | <b>1</b>  |
| Very small practice                                               |          |           |           | 1         | 1         |
| <b>Netherlands</b>                                                | <b>2</b> | <b>16</b> | <b>12</b> | <b>12</b> | <b>42</b> |
| <b>Mixed practice</b>                                             |          | <b>6</b>  | <b>4</b>  | <b>3</b>  | <b>13</b> |
| Large practice                                                    |          | 4         | 2         | 3         | 9         |
| Medium practice                                                   |          |           | 1         |           | 1         |
| Small practice                                                    |          | 1         |           |           | 1         |
| Very small practice                                               |          | 1         | 1         |           | 2         |
| <b>Practice specialised in cattle</b>                             |          | <b>2</b>  | <b>1</b>  |           | <b>3</b>  |
| Large practice                                                    |          | 1         | 1         |           | 2         |
| Medium practice                                                   |          | 1         |           |           | 1         |
| <b>Practice specialised in pigs</b>                               |          | <b>6</b>  | <b>4</b>  | <b>6</b>  | <b>16</b> |
| Large practice                                                    |          | 3         | 3         | 2         | 8         |
| Medium practice                                                   |          | 1         |           | 3         | 4         |
| Small practice                                                    |          | 1         | 1         | 1         | 3         |
| Very small practice                                               |          | 1         |           |           | 1         |
| <b>Practice specialised in poultry, incl. chicken and turkeys</b> | <b>2</b> | <b>2</b>  | <b>3</b>  | <b>3</b>  | <b>10</b> |
| Large practice                                                    | 1        | 1         | 1         | 3         | 6         |
| Medium practice                                                   |          |           | 1         |           | 1         |
| Small practice                                                    | 1        | 1         | 1         |           | 3         |
| <b>Norway</b>                                                     |          | <b>1</b>  |           |           | <b>1</b>  |
| <b>Mixed practice</b>                                             |          | <b>1</b>  |           |           | <b>1</b>  |
| Medium practice                                                   |          | 1         |           |           | 1         |
| <b>Other</b>                                                      | <b>2</b> | <b>10</b> | <b>6</b>  | <b>3</b>  | <b>21</b> |
| <b>Mixed practice</b>                                             |          | <b>4</b>  | <b>4</b>  | <b>1</b>  | <b>9</b>  |
| Small practice                                                    |          | 1         |           |           | 1         |
| Very small practice                                               |          | 3         | 4         | 1         | 8         |
| <b>Practice specialised in cattle</b>                             |          | <b>3</b>  | <b>2</b>  |           | <b>5</b>  |

|                                                                   |          |           |          |          |           |
|-------------------------------------------------------------------|----------|-----------|----------|----------|-----------|
| Large practice                                                    |          |           | 1        |          | 1         |
| Medium practice                                                   |          | 1         |          |          | 1         |
| Small practice                                                    |          | 1         |          |          | 1         |
| Very small practice                                               |          | 1         | 1        |          | 2         |
| <b>Practice specialised in pigs</b>                               | <b>1</b> | <b>3</b>  |          | <b>1</b> | <b>5</b>  |
| Small practice                                                    | 1        | 1         |          |          | 2         |
| Very small practice                                               |          | 2         |          | 1        | 3         |
| <b>Practice specialised in poultry, incl. chicken and turkeys</b> | <b>1</b> |           |          | <b>1</b> | <b>2</b>  |
| Small practice                                                    |          |           |          | 1        | 1         |
| (blank)                                                           | 1        |           |          |          | 1         |
| <b>Poland</b>                                                     | <b>4</b> | <b>15</b> | <b>8</b> | <b>8</b> | <b>35</b> |
| <b>Mixed practice</b>                                             | <b>1</b> | <b>10</b> | <b>5</b> | <b>2</b> | <b>18</b> |
| Large practice                                                    |          | 1         |          |          | 1         |
| Very small practice                                               | 1        | 9         | 5        | 2        | 17        |
| <b>Practice specialised in cattle</b>                             |          | <b>1</b>  | <b>1</b> | <b>3</b> | <b>5</b>  |
| Small practice                                                    |          | 1         |          |          | 1         |
| Very small practice                                               |          |           | 1        | 3        | 4         |
| <b>Practice specialised in pigs</b>                               | <b>1</b> | <b>2</b>  |          | <b>1</b> | <b>4</b>  |
| Small practice                                                    | 1        |           |          | 1        | 2         |
| Very small practice                                               |          | 2         |          |          | 2         |
| <b>Practice specialised in poultry, incl. chicken and turkeys</b> | <b>2</b> | <b>2</b>  | <b>2</b> | <b>2</b> | <b>8</b>  |
| Medium practice                                                   | 1        |           |          |          | 1         |
| Small practice                                                    |          |           | 1        | 1        | 2         |
| Very small practice                                               | 1        | 2         | 1        | 1        | 5         |
| <b>Portugal</b>                                                   |          | <b>1</b>  |          |          | <b>1</b>  |
| <b>Practice specialised in poultry, incl. chicken and turkeys</b> |          | <b>1</b>  |          |          | <b>1</b>  |
| Very small practice                                               |          | 1         |          |          | 1         |
| <b>Romania</b>                                                    |          |           | <b>1</b> | <b>2</b> | <b>3</b>  |
| <b>Mixed practice</b>                                             |          |           |          | <b>1</b> | <b>1</b>  |
| Very small practice                                               |          |           |          | 1        | 1         |
| <b>Practice specialised in pigs</b>                               |          |           | <b>1</b> |          | <b>1</b>  |
| Very small practice                                               |          |           | 1        |          | 1         |
| <b>Practice specialised in poultry, incl. chicken and turkeys</b> |          |           |          | <b>1</b> | <b>1</b>  |
| Small practice                                                    |          |           |          | 1        | 1         |

|                                                            |    |    |    |    |     |
|------------------------------------------------------------|----|----|----|----|-----|
| Slovakia                                                   |    | 1  | 1  |    | 2   |
| Mixed practice                                             |    | 1  |    |    | 1   |
| Very small practice                                        |    | 1  |    |    | 1   |
| Practice specialised in pigs                               |    |    | 1  |    | 1   |
| Very small practice                                        |    |    | 1  |    | 1   |
| Slovenia                                                   | 1  | 3  | 2  | 1  | 7   |
| Mixed practice                                             |    | 3  | 1  | 1  | 5   |
| Small practice                                             |    | 1  | 1  |    | 2   |
| Very small practice                                        |    | 2  |    | 1  | 3   |
| Practice specialised in cattle                             | 1  |    | 1  |    | 2   |
| Very small practice                                        | 1  |    | 1  |    | 2   |
| Spain                                                      | 22 | 82 | 75 | 48 | 227 |
| Cuniculture                                                |    | 5  | 2  |    | 7   |
| Large practice                                             |    | 1  |    |    | 1   |
| Medium practice                                            |    | 1  |    |    | 1   |
| Small practice                                             |    | 2  | 2  |    | 4   |
| Very small practice                                        |    | 1  |    |    | 1   |
| Mixed practice                                             | 3  | 17 | 12 | 6  | 38  |
| Large practice                                             |    | 6  | 1  | 2  | 9   |
| Medium practice                                            |    | 1  |    | 1  | 2   |
| Small practice                                             |    | 4  | 1  |    | 5   |
| Very small practice                                        | 3  | 6  | 10 | 3  | 22  |
| Practice specialised in cattle                             | 13 | 34 | 38 | 23 | 108 |
| Large practice                                             | 1  | 6  | 7  | 5  | 19  |
| Medium practice                                            | 1  | 2  | 6  | 1  | 10  |
| Small practice                                             | 3  | 5  | 5  | 3  | 16  |
| Very small practice                                        | 8  | 20 | 20 | 13 | 61  |
| (blank)                                                    |    | 1  |    | 1  | 2   |
| Practice specialised in pigs                               | 5  | 23 | 16 | 13 | 57  |
| Large practice                                             | 1  | 8  | 2  | 5  | 16  |
| Medium practice                                            |    | 1  | 1  | 2  | 4   |
| Small practice                                             |    | 3  | 3  | 3  | 9   |
| Very small practice                                        | 4  | 11 | 10 | 3  | 28  |
| Practice specialised in poultry, incl. chicken and turkeys |    | 3  | 4  | 5  | 12  |

|                                                                   |           |            |            |            |            |
|-------------------------------------------------------------------|-----------|------------|------------|------------|------------|
| Large practice                                                    |           | 1          | 1          | 1          | 3          |
| Small practice                                                    |           |            | 2          |            | 2          |
| Very small practice                                               |           | 2          | 1          | 4          | 7          |
| <b>Practice specialised in sheep and goats</b>                    | <b>1</b>  |            | <b>3</b>   | <b>1</b>   | <b>5</b>   |
| Large practice                                                    |           |            |            | 1          | 1          |
| Medium practice                                                   |           |            | 1          |            | 1          |
| Very small practice                                               | 1         |            | 2          |            | 3          |
| <b>Sweden</b>                                                     | <b>3</b>  | <b>2</b>   | <b>4</b>   | <b>6</b>   | <b>15</b>  |
| <b>Mixed practice</b>                                             | <b>3</b>  |            | <b>1</b>   | <b>5</b>   | <b>9</b>   |
| Large practice                                                    |           |            |            | 1          | 1          |
| Medium practice                                                   | 2         |            |            | 3          | 5          |
| Small practice                                                    | 1         |            | 1          | 1          | 3          |
| <b>Practice specialised in cattle</b>                             |           | <b>1</b>   | <b>1</b>   | <b>1</b>   | <b>3</b>   |
| Large practice                                                    |           | 1          |            |            | 1          |
| Small practice                                                    |           |            | 1          |            | 1          |
| Very small practice                                               |           |            |            | 1          | 1          |
| <b>Practice specialised in poultry, incl. chicken and turkeys</b> |           | <b>1</b>   | <b>2</b>   |            | <b>3</b>   |
| Very small practice                                               |           | 1          | 2          |            | 3          |
| <b>Switzerland</b>                                                |           | <b>2</b>   |            | <b>2</b>   | <b>4</b>   |
| <b>Practice specialised in pigs</b>                               |           | <b>1</b>   |            |            | <b>1</b>   |
| Small practice                                                    |           | 1          |            |            | 1          |
| <b>Practice specialised in poultry, incl. chicken and turkeys</b> |           | <b>1</b>   |            | <b>2</b>   | <b>3</b>   |
| Very small practice                                               |           | 1          |            | 2          | 3          |
| <b>United Kingdom</b>                                             | <b>2</b>  | <b>3</b>   | <b>1</b>   | <b>1</b>   | <b>7</b>   |
| <b>Practice specialised in pigs</b>                               |           | <b>1</b>   | <b>1</b>   |            | <b>2</b>   |
| Large practice                                                    |           | 1          | 1          |            | 2          |
| <b>Practice specialised in poultry, incl. chicken and turkeys</b> | <b>2</b>  | <b>2</b>   |            | <b>1</b>   | <b>5</b>   |
| Large practice                                                    | 1         |            |            | 1          | 2          |
| Small practice                                                    | 1         |            |            |            | 1          |
| Very small practice                                               |           | 2          |            |            | 2          |
| <b>Total</b>                                                      | <b>54</b> | <b>271</b> | <b>178</b> | <b>159</b> | <b>662</b> |
