# Supplementary material for: Real-World Data on Antibiotic Group Treatment in European Livestock: Drivers, Conditions, and Alternatives
Source: MDPI journal article supplement (doi:10.3390/antibiotics11081046), 2022-08-03
Supplement: s1 [file s1]

Table S2. FVE Survey on Metaphylaxis in Livestock and Poultry

| Title               | FVE Survey on Metaphylaxis in Livestock and Poultry                                                                                                                                                                                                                                                                                                                                                                                                                                                                                                                                                                                                                                                                                                                                                                                                                                                                                                                                                                                                                                                                                                                                                                                                                                                                                                                                                                                                                                                                                                                                                                                                                                                                                                                                                                                                                                                                                                                                                                                                                                                                                                                                                                                                                                                                                                                                                                                              |
|---------------------|--------------------------------------------------------------------------------------------------------------------------------------------------------------------------------------------------------------------------------------------------------------------------------------------------------------------------------------------------------------------------------------------------------------------------------------------------------------------------------------------------------------------------------------------------------------------------------------------------------------------------------------------------------------------------------------------------------------------------------------------------------------------------------------------------------------------------------------------------------------------------------------------------------------------------------------------------------------------------------------------------------------------------------------------------------------------------------------------------------------------------------------------------------------------------------------------------------------------------------------------------------------------------------------------------------------------------------------------------------------------------------------------------------------------------------------------------------------------------------------------------------------------------------------------------------------------------------------------------------------------------------------------------------------------------------------------------------------------------------------------------------------------------------------------------------------------------------------------------------------------------------------------------------------------------------------------------------------------------------------------------------------------------------------------------------------------------------------------------------------------------------------------------------------------------------------------------------------------------------------------------------------------------------------------------------------------------------------------------------------------------------------------------------------------------------------------------|
| <b>Introduction</b> | <p>Major efforts have been made by the veterinary profession to reduce the need for antimicrobial use in farmed animals. However, animals can become sick even under the best rearing conditions and may need to be treated with antimicrobials. Metaphylaxis is defined in the Regulation 6/2019 by "the administration of a medicinal product to a group of animals after a diagnosis of clinical disease in part of the group has been established, with the aim of treating the clinically sick animals and controlling the spread of the disease to animals in close contact and at risk and which may already be subclinically infected" and this definition is supported by EMA.</p> <p>However, a wide ban of metaphylaxis may result in high morbidity, mortality and devastating production losses. This new Regulation (EC) 2019/6 stipulates that antimicrobials as metaphylaxis should only be used where the risk of spreading a contagious bacterial disease is high and no other appropriate alternatives are available. Colistin, often used for metaphylaxis, has been categorised by WHO as critically important antibiotic of highest priority, spotlighting its use in veterinary medicine. FVE strongly advocates the principles of antimicrobial stewardship and responsible use but believes that some indications require inevitably whole group treatment of farmed animals to effectively maintain animal health and welfare. Further injudicious restriction in the availability of veterinary antibiotics intended for flock, group or herd medication may result in a practical ban of effective treatment by metaphylaxis in animal husbandry.</p> <p>In this short survey, we would like to gather field experience in regard of metaphylaxis with a special emphasis on colistin use. We aim to gain information on the most frequent indications for metaphylaxis group treatment, to investigate possible alternative strategies, and to identify lessons learned. Please indicate below how and why you treated food-producing animals metaphylactically. If you would like to receive a summary of the survey outcome, please fill in your email address below. We will contact you as soon as the report is ready.</p> <p>Data will be handled anonymously and in line with the EU GDPR rules.</p> <p>For questions please contact Wiebke Jansen, FVE (<a href="mailto:info@fve.org">info@fve.org</a>)</p> |

Table S2. FVE Survey on Metaphylaxis in Livestock and Poultry

| Question                                                                                                         | Answer type          | Answer options     |                              |                                                            |              |                                |           |
|------------------------------------------------------------------------------------------------------------------|----------------------|--------------------|------------------------------|------------------------------------------------------------|--------------|--------------------------------|-----------|
| 1. In which country do you work as a veterinary practitioner?                                                    | Multiple Choice      | Albania            | Armenia                      | Austria                                                    |              | Belgium                        |           |
|                                                                                                                  |                      | Bosnia/Herzegovina | Bulgaria                     | Croatia                                                    |              | Cyprus                         |           |
|                                                                                                                  |                      | Czech Republic     | Denmark                      | Estonia                                                    |              | Finland                        |           |
|                                                                                                                  |                      | France             | Germany                      | Greece                                                     |              | Hungary                        |           |
|                                                                                                                  |                      | Iceland            | Ireland                      | Italy                                                      |              | Latvia                         |           |
|                                                                                                                  |                      | Lithuania          | Luxembourg                   | Malta                                                      |              | Montenegro                     |           |
|                                                                                                                  |                      | Netherlands        | North Macedonia              | Norway                                                     |              | Poland                         |           |
|                                                                                                                  |                      | Portugal           | Romania                      | Russia                                                     |              | Serbia                         |           |
|                                                                                                                  |                      | Slovakia           | Slovenia                     | Spain                                                      |              | Sweden                         |           |
|                                                                                                                  |                      | Switzerland        | Ukraine                      | United Kingdom                                             |              | Other                          |           |
| 2. How many years of experience do you have as a veterinary practitioner?                                        | Multiple Choice      | <5 years           | 6-15 years                   |                                                            | 16-25 years  |                                | >25 years |
| 3. In which type of practice do you work?                                                                        | Multiple Choice      | Mixed practice     | Practice specialised in pigs | Practice specialised in poultry, incl. chicken and turkeys |              | Practice specialised in cattle | Other:    |
| 4. How many livestock veterinarians work in your practice?                                                       | Multiple Choice      | 1-3                | 4-6                          |                                                            | 7-9          |                                | >10       |
| 5. Is metaphylaxis required as a treatment option in your routine work? (Only answer for species that you treat) | Multiple Choice Grid | Never              | Rarely                       |                                                            | Occasionally |                                | Often     |
|                                                                                                                  | Cattle incl. calves  |                    |                              |                                                            |              |                                |           |
|                                                                                                                  | Poultry              |                    |                              |                                                            |              |                                |           |
|                                                                                                                  | Pigs incl. piglets   |                    |                              |                                                            |              |                                |           |
|                                                                                                                  | Other                |                    |                              |                                                            |              |                                |           |

Table S2. FVE Survey on Metaphylaxis in Livestock and Poultry

|                                                                                                                                                                                                                                                                                                                                        |                      |                                                                               |                                                                                   |                                     |                      |      |
|----------------------------------------------------------------------------------------------------------------------------------------------------------------------------------------------------------------------------------------------------------------------------------------------------------------------------------------|----------------------|-------------------------------------------------------------------------------|-----------------------------------------------------------------------------------|-------------------------------------|----------------------|------|
| 6. Which percentage of your treatments is represented by metaphylaxis or group treatment? (Only answer for the species that you treat)                                                                                                                                                                                                 | Multiple Choice Grid | <25%                                                                          | >25%                                                                              | >50%                                | >75%                 | >90% |
|                                                                                                                                                                                                                                                                                                                                        | Cattle incl. calves  |                                                                               |                                                                                   |                                     |                      |      |
|                                                                                                                                                                                                                                                                                                                                        | Poultry              |                                                                               |                                                                                   |                                     |                      |      |
|                                                                                                                                                                                                                                                                                                                                        | Pigs incl. piglets   |                                                                               |                                                                                   |                                     |                      |      |
|                                                                                                                                                                                                                                                                                                                                        | Other                |                                                                               |                                                                                   |                                     |                      |      |
| 7. When do you take the decision to apply metaphylactic treatment?                                                                                                                                                                                                                                                                     | Multiple Choice      | Depending on the severity of signs and the suspected agent/condition involved | Diagnosis of further laboratory testing/microbiology/in vitro sensitivity testing | Known disease which spreads quickly |                      |      |
| 8. Based on your experience, which "(sub)species - diseases – pathogen" combination would have the most devastating effect regarding animal health and welfare (morbidity, mortality, production loss, ..) if metaphylaxis would be banned? You can give up to 5 combinations. Example : Broiler chicken - septicemia - <i>E. coli</i> | Long Paragraph       |                                                                               |                                                                                   |                                     |                      |      |
| 8a. Please indicate here the one most frequent pattern for metaphylactic treatment that you apply in your practice by ticking the corresponding boxes - species and group size                                                                                                                                                         | Multiple Choice Grid | Cattle                                                                        | Pigs                                                                              | Poultry                             | Other farmed animals |      |
|                                                                                                                                                                                                                                                                                                                                        | 0-15 individuals     |                                                                               |                                                                                   |                                     |                      |      |
|                                                                                                                                                                                                                                                                                                                                        | 16-30 individuals    |                                                                               |                                                                                   |                                     |                      |      |

Table S2. FVE Survey on Metaphylaxis in Livestock and Poultry

|                                                                                                                                                                                             |                               |                      |                           |                            |                          |                           |                        |
|---------------------------------------------------------------------------------------------------------------------------------------------------------------------------------------------|-------------------------------|----------------------|---------------------------|----------------------------|--------------------------|---------------------------|------------------------|
|                                                                                                                                                                                             | >30 individuals               |                      |                           |                            |                          |                           |                        |
|                                                                                                                                                                                             | >100 individuals              |                      |                           |                            |                          |                           |                        |
|                                                                                                                                                                                             | >1000 individuals             |                      |                           |                            |                          |                           |                        |
| 8b. Please indicate here the one most frequent pattern for metaphylactic treatment that you apply in your practice by ticking the corresponding boxes - production stage and disease        | Multiple Choice Grid          | Septicaemia          | Respiratory diseases      | Gastro-intestinal diseases | Mastitis/metritis        | Loco-motor diseases       | Neuro-logical diseases |
|                                                                                                                                                                                             | Neonatal/at hatch             |                      |                           |                            |                          |                           |                        |
|                                                                                                                                                                                             | At weaning                    |                      |                           |                            |                          |                           |                        |
|                                                                                                                                                                                             | After transport/newly grouped |                      |                           |                            |                          |                           |                        |
|                                                                                                                                                                                             | Fattening/rearing             |                      |                           |                            |                          |                           |                        |
|                                                                                                                                                                                             | Breeding/postpartum           |                      |                           |                            |                          |                           |                        |
|                                                                                                                                                                                             | In lay/lactation              |                      |                           |                            |                          |                           |                        |
|                                                                                                                                                                                             |                               |                      |                           |                            |                          |                           |                        |
| 8c. Please indicate here the one most frequent pattern for metaphylactic treatment that you apply in your practice by ticking the corresponding boxes - antibiotic and administration route | Multiple Choice Grid          | Per os-premixed feed | Per os- feed top dressing | Per os-drinking water      | Parenteral-sub-cutaneous | Parenteral-intra-muscular | Parenteral intrave     |

Table S2. FVE Survey on Metaphylaxis in Livestock and Poultry

|                                                                                                                                                                                                                                             |                                                     |                  |  |                                   |  |                                                         |          |
|---------------------------------------------------------------------------------------------------------------------------------------------------------------------------------------------------------------------------------------------|-----------------------------------------------------|------------------|--|-----------------------------------|--|---------------------------------------------------------|----------|
|                                                                                                                                                                                                                                             |                                                     |                  |  |                                   |  |                                                         | no<br>us |
|                                                                                                                                                                                                                                             | (Fluoro)-<br>quinolones                             |                  |  |                                   |  |                                                         |          |
|                                                                                                                                                                                                                                             | Colistin                                            |                  |  |                                   |  |                                                         |          |
|                                                                                                                                                                                                                                             | Macrolides                                          |                  |  |                                   |  |                                                         |          |
|                                                                                                                                                                                                                                             | 3G or 4G<br>cephalon-<br>sporins                    |                  |  |                                   |  |                                                         |          |
|                                                                                                                                                                                                                                             | Amino-<br>glycosides                                |                  |  |                                   |  |                                                         |          |
|                                                                                                                                                                                                                                             | Penicillins<br>without<br>beta-lactam<br>inhibitors |                  |  |                                   |  |                                                         |          |
|                                                                                                                                                                                                                                             | Penicillins<br>with beta-<br>lactam<br>inhibitors   |                  |  |                                   |  |                                                         |          |
| 8d. Based on your examples, which would be the most significant health and welfare consequences for the condition that you indicated above if metaphylaxis would be banned?                                                                 | Long<br>paragraph                                   |                  |  |                                   |  |                                                         |          |
| 9. Please indicate the three most effective alternative measures to prevent and/or to treat diseases other than metaphylactically with antibiotics (and particularly colistin) that must become available to implement a consistent change? | Multiple<br>Choice                                  | Vaccination      |  | Other/new licensed<br>antibiotics |  | Other non-<br>antibiotic<br>treatments (e.g.<br>NSAIDs) |          |
|                                                                                                                                                                                                                                             |                                                     | Improved housing |  | Improved hygiene<br>measures      |  | Improved feeding                                        |          |

Table S2. FVE Survey on Metaphylaxis in Livestock and Poultry

|                                                                                                                                                          |                 |                                 |                                       |        |
|----------------------------------------------------------------------------------------------------------------------------------------------------------|-----------------|---------------------------------|---------------------------------------|--------|
|                                                                                                                                                          |                 | Improved herd health management | Structural changes e.g. later weaning | Other: |
| If you have additional information on your use of metaphylaxis, please share them here:                                                                  | Short paragraph |                                 |                                       |        |
| If you would like to receive a summary of the survey outcome, please fill in your email address here. We will contact we as soon as the report is ready. | Short paragraph |                                 |                                       |        |
