# Supplementary material for: Real-World Data on Antibiotic Group Treatment in European Livestock: Drivers, Conditions, and Alternatives
Source: MDPI journal article supplement (doi:10.3390/antibiotics11081046), 2022-08-03
Supplement: s1 [file s1]

**Table S3.** STROBE Statement—Checklist of items that should be included in reports of cross-sectional studies adapted from [64]

|                          | Item No | Recommendation                                                                                                                                                                                               | Page No |
|--------------------------|---------|--------------------------------------------------------------------------------------------------------------------------------------------------------------------------------------------------------------|---------|
| Title and Abstract       | 1       | (a) Indicate the study’s design with a commonly used term in the title or the abstract                                                                                                                       | 1       |
|                          |         | (b) Provide in the abstract an informative and balanced summary of what was done and what was found                                                                                                          | 1       |
| Introduction             |         |                                                                                                                                                                                                              |         |
| Background/Rationale     | 2       | Explain the scientific background and rationale for the investigation being reported                                                                                                                         | 1-2     |
| Objectives               | 3       | State specific objectives, including any prespecified hypotheses                                                                                                                                             | 1-2     |
| Methods                  |         |                                                                                                                                                                                                              |         |
| Study design             | 4       | Present key elements of study design early in the paper                                                                                                                                                      | 15-16   |
| Setting                  | 5       | Describe the setting, locations, and relevant dates, including periods of recruitment, exposure, follow -up, and data collection                                                                             | 16      |
| Participants             | 6       | Give the eligibility criteria, and the sources and methods of selection of participants                                                                                                                      | 16      |
| Variables                | 7       | Clearly define all outcomes, exposures, predictors, potential confounders, and effect modifiers. Give diagnostic criteria, if applicable                                                                     | N/A     |
| Data Sources/Measurement | 8*      | For each variable of interest, give sources of data and details of methods of assessment (measurement). Describe comparability of assessment methods if there is more than one group                         | N/A     |
| Bias                     | 9       | Describe any efforts to address potential sources of bias                                                                                                                                                    | 10      |
| Study Size               | 10      | Explain how the study size was arrived at                                                                                                                                                                    | 15      |
| Quantitative Variables   | 11      | Explain how quantitative variables were handled in the analyses. If applicable, describe which groupings were chosen and why                                                                                 | 15      |
|                          |         | (a) Describe all statistical methods, including those used to control for confounding                                                                                                                        | 15-16   |
|                          |         | (b) Describe any methods used to examine subgroups and interactions                                                                                                                                          | N/A     |
| Statistical Methods      | 12      | (c) Explain how missing data were addressed                                                                                                                                                                  | N/A     |
|                          |         | (d) If applicable, describe analytical methods taking account of sampling strategy                                                                                                                           | 16      |
|                          |         | (e) Describe any sensitivity analyses                                                                                                                                                                        | N/A     |
| Results                  |         |                                                                                                                                                                                                              |         |
| Participants             | 13*     | (a) Report numbers of individuals at each stage of study—eg numbers potentially eligible, examined for eligibility, confirmed eligible, included in the study, completing follow-up, and analyzed            | 3/4     |
|                          |         | (b) Give reasons for non-participation at each stage                                                                                                                                                         | N/A     |
|                          |         | (c) Consider use of a flow diagram                                                                                                                                                                           | N/A     |
| Descriptive Data         | 14*     | (a) Give characteristics of study participants (eg demographic, clinical, social) and information on exposures and potential confounders                                                                     | Tab. S1 |
|                          |         | (b) Indicate number of participants with missing data for each variable of interest                                                                                                                          | N/A     |
| Outcome Data             | 15*     | (a) Report numbers of outcome events or summary measures                                                                                                                                                     | 3-6     |
|                          |         | (b) Give unadjusted estimates and, if applicable, confounder-adjusted estimates and their precision (eg, 95% confidence interval). Make clear which confounders were adjusted for and why they were included | N/A     |
| Main Results             | 16      | (a) Report category boundaries when continuous variables were categorized                                                                                                                                    | 3       |
|                          |         | (b) If relevant, consider translating estimates of relative risk into absolute risk for a meaningful time period                                                                                             | N/A     |
| Other Analyses           | 17      | Report other analyses done—eg analyses of subgroups and interactions, and sensitivity analyses                                                                                                               | 4-9     |
| Discussion               |         |                                                                                                                                                                                                              |         |
| Key Results              | 18      | Summarize key results with reference to study objectives                                                                                                                                                     | 9       |
| Limitations              | 19      | Discuss limitations of the study, taking into account sources of potential bias or imprecision. Discuss both direction and magnitude of any potential bias                                                   | 10      |

**Table S3.** STROBE Statement—Checklist of items that should be included in reports of cross-sectional studies adapted from [64]

|                          |    |                                                                                                                                                                            |       |
|--------------------------|----|----------------------------------------------------------------------------------------------------------------------------------------------------------------------------|-------|
| Interpretation           | 20 | Give a cautious overall interpretation of results considering objectives, limitations, multiplicity of analyses, results from similar studies, and other relevant evidence | 10-13 |
| Generalizability         | 21 | Discuss the generalizability (external validity) of the study results                                                                                                      | 16    |
| <b>Other information</b> |    |                                                                                                                                                                            |       |
| Funding                  | 22 | Give the source of funding and the role of the funders for the present study and, if applicable, for the original study on which the present article is based              | 16    |

\*Give information separately for exposed and unexposed groups.
